# Supplementary material
Source: Research Square preprint supplement (doi:10.21203/rs.3.rs-8800664/v1)

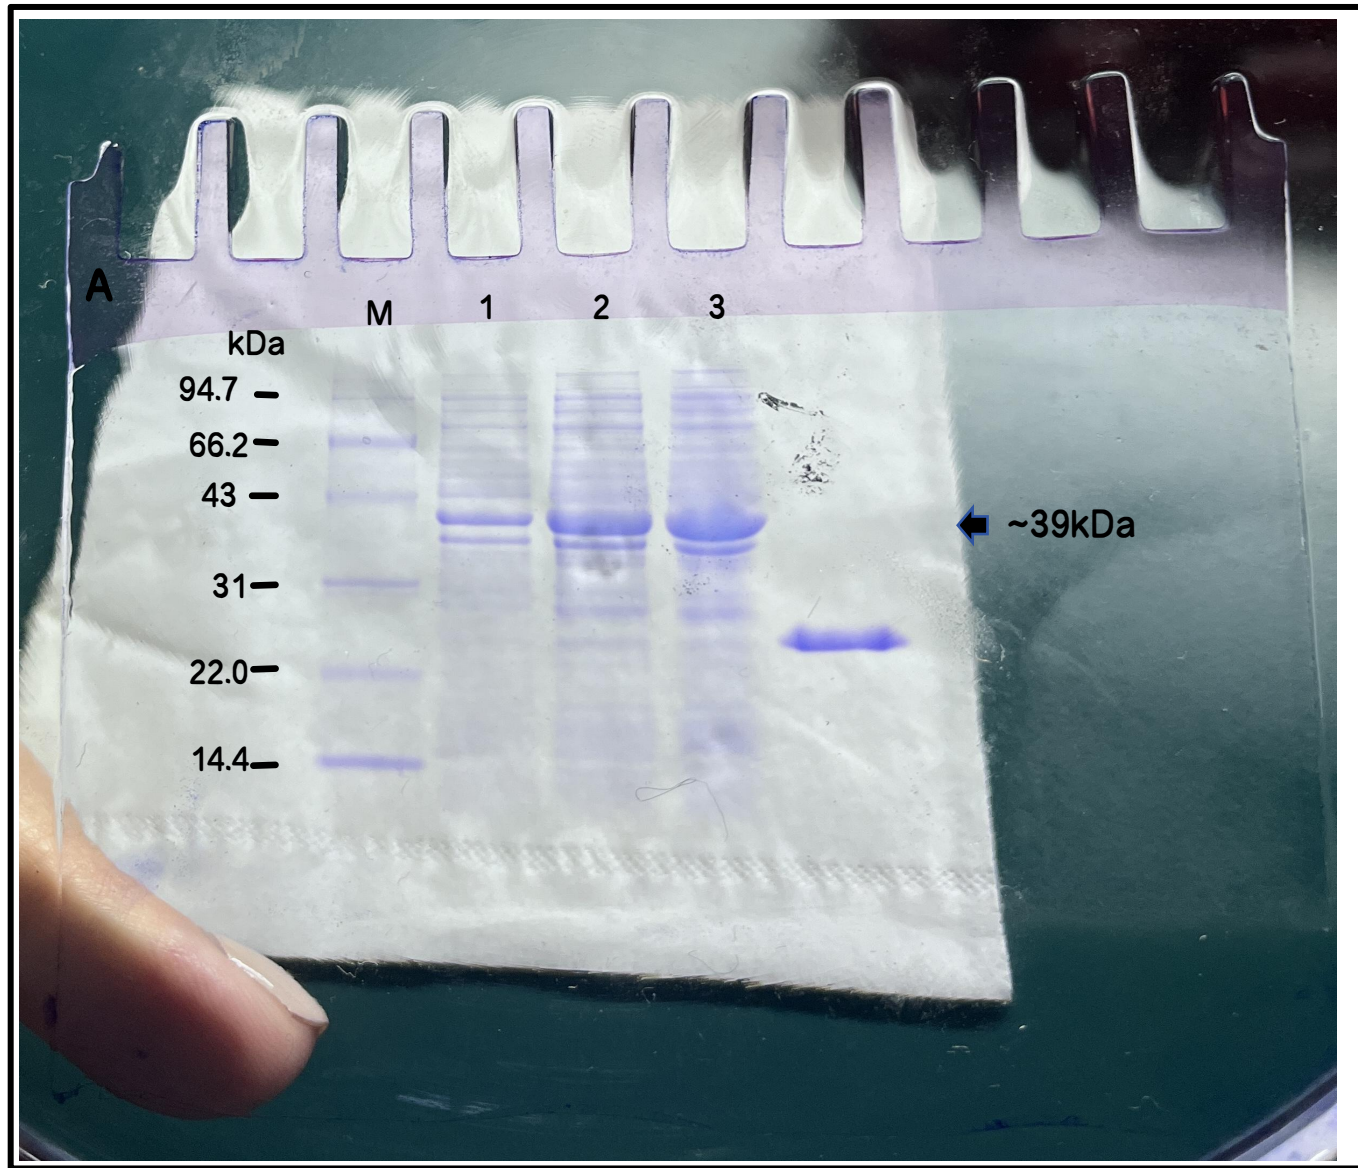

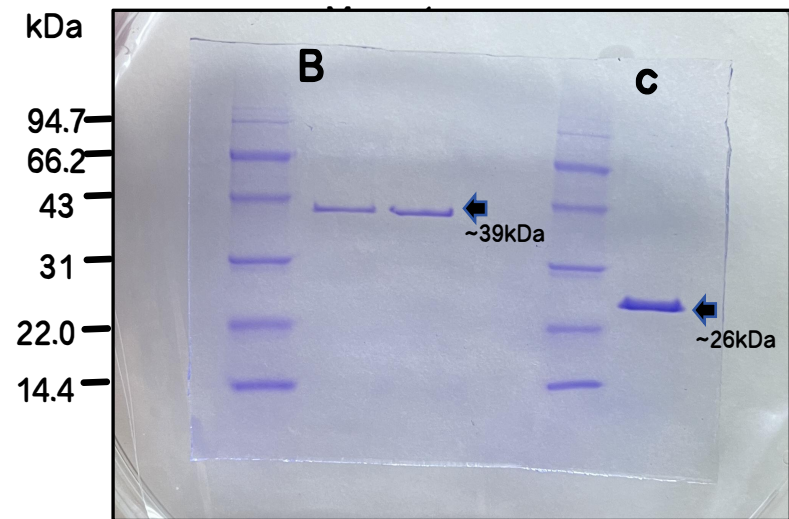

C

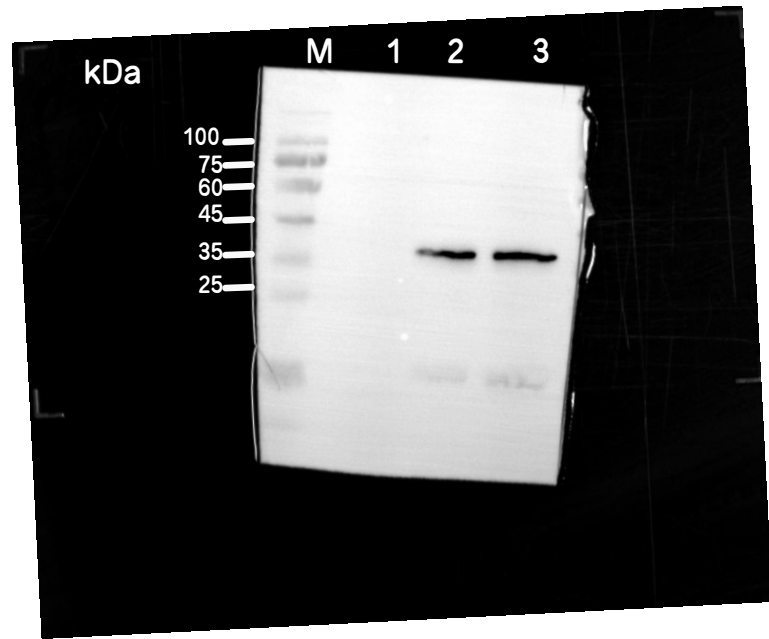

Supplement: Supplementary file 1 [file 02ab97f357ffe1e0fcbb32cd.pdf]
